# Supplementary material for: Solvent-directed sol-gel assembly of 3-dimensional graphene-tented metal oxides and strong synergistic disparities in lithium storage
Source: Royal Society of Chemistry journal article supplement (doi:10.1039/c5ta10730j), 2016-01-01
Supplement: c5ta10730j1.pdf [file c5ta10730j1.pdf]

## Electronic Supplementary Information for

### Solvent-directed Solgel Assembly of 3-dimensional Graphene-tented Metal Oxides and Strong Synergistic Disparities in Lithium Storage

Jianchao Ye<sup>†a</sup>, Yonghao An<sup>†ab</sup>, Elizabeth Montalvo<sup>a</sup>, Patrick G. Campbell<sup>a</sup>, Marcus A. Worsley<sup>a</sup>, Ich C. Tran<sup>a</sup>, Yuanyue Liu<sup>ac</sup>, Brandon C. Wood<sup>a</sup>, Juergen Biener<sup>a</sup>, Hanqing Jiang<sup>c</sup>, Ming Tang<sup>d</sup>, Y. Morris Wang<sup>ab\*</sup>

<sup>a</sup>Physical and Life Sciences Directorate, Lawrence Livermore National Laboratory, Livermore, CA 94550, United States

<sup>b</sup>School for Engineering of Matter, Transport and Energy, Arizona State University, Tempe, AZ 85286, United States

<sup>c</sup>National Renewable Energy Laboratory, Golden, CO 80401, United States

<sup>d</sup>Department of Materials Science and Nano-Engineering, Rice University, Houston, TX 77005, United States

The corresponding author: ymwang@llnl.gov

-----

#### Table of Contents

**Spherical-cap model**

**Graphene surface coverage during the lithiation**

**Table S1**

**Figures S1-S12**

**References**

## Spherical-cap model

Based on our TEM measurements, we find that the average diameter of the nanoparticles in the lithiation state increases by a factor of 2.5 compared to that in the delithiated state. As the volume of a spherical particle is given by  $V=4/3\pi(D/2)^3$ , where  $D$  is the particle size (i.e., diameter) measured under TEM. This would project a volume expansion of nearly 1560%, which is unlikely. We recognize, however, that the  $\text{Fe}_2\text{O}_3$  nanoparticles are nucleated on and thus interfaced with the graphene, which most likely adopt a spherical-cap shape with a height ( $h$ ) and the base diameter ( $2a$ ) (see the left-hand side scheme); the ratio of  $h/a$  defines the particle shape; i.e.,  $h/a=1$  (hemisphere);  $h/a=2$  (sphere). The volume of the spherical-cap is given by  $V = \frac{\pi h}{6}(3a^2 + h^2)$ . After the lithiation, the height and base radius become  $h'$  and

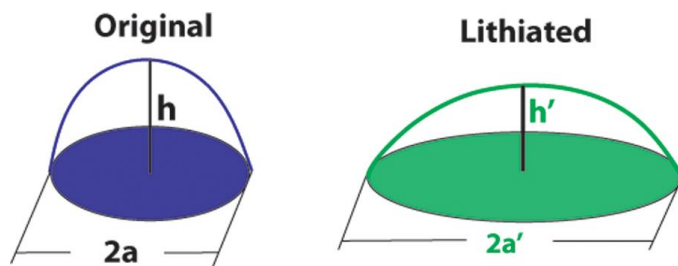

$a'$ . Assuming a volume expansion of ~96% for  $\text{Fe}_2\text{O}_3$ ,<sup>1</sup> we numerically solve  $h'$  based on the measured  $2a$  and  $2a'$  from TEM. **Fig. S11** shows the calculation results. In all the cases, we observe a reduction of height during the lithiation; i.e., nanoparticles

preferentially spread over the graphene surface during the lithiation process. The calculation is the basis of the schematic presentation in the main figure, Fig. 4D.

## Graphene surface coverage during the lithiation

To estimate the graphene surface area that is covered by the lithiated  $\text{Fe}_2\text{O}_3$  particles in a graphene/ $\gamma$ - $\text{Fe}_2\text{O}_3$  hybrid electrode sample with 56 wt.%  $\text{Fe}_2\text{O}_3$  load, we make the following assumptions:

- 1) Uniform particle sizes.
- 2) Pristine  $\text{Fe}_2\text{O}_3$  particles have a hemispherical shape.
- 3) After lithiation, the contact area between particles and graphene sheets is circular.
- 4) Graphene surface is flat.

The following parameters are employed in our calculations:

$\gamma$ - $\text{Fe}_2\text{O}_3$  density:  $\rho_{FO} = 4.89 \text{ g/cm}^3$

pristine  $\text{Fe}_2\text{O}_3$  particle size:  $d_{FO} = 8.1 \text{ nm}$  (from TEM)

lithiated  $\text{Fe}_2\text{O}_3$  particle size:  $D_{FO} = 20.6 \text{ nm}$  (from TEM)

specific surface area of GMA:  $a_{GMA} = 1500 \text{ m}^2/\text{g}$

weight fraction of  $\text{Fe}_2\text{O}_3$  in the hybrid sample:  $f = 0.56$ .

The number of Fe<sub>2</sub>O<sub>3</sub> particles in 1 g of graphene/γ-Fe<sub>2</sub>O<sub>3</sub> hybrid is

$$N_{FO} = \frac{f}{r_{FO}(1/12)\rho d_{FO}^3} = 8.2 \times 10^{17}$$

After full lithiation, the graphene surface area covered by a Fe<sub>2</sub>O<sub>3</sub> is

$$a_{FO} = \rho D_{FO}^2 / 4 = 333 \text{ nm}^2$$

The surface area covered by all Fe<sub>2</sub>O<sub>3</sub> particles is

$$A_{FO} = N_{FO} a_{FO} = 270 \text{ m}^2$$

On the other hand, the total graphene surface area per gram of the composite is

$$A_{GMA} = (1 - f) a_{GMA} = 660 \text{ m}^2$$

The graphene surface coverage by the lithiated Fe<sub>2</sub>O<sub>3</sub> particles is thus  $\Gamma = A_{FO}/A_{GMA} = 41\%$ .

If assuming the ratio of particle sizes in the lithiated and delithiated states is a constant, i.e.,  $D_{FO}/d_{FO} = \lambda$ , one has

$$G = \frac{3f\lambda^2}{(1-f)a_{GMA}r_{FO}d_{FO}} \propto \frac{1}{d_{FO}}$$

i.e., the surface coverage is inversely proportional to the particle size.

**Table S1.** A summary of our sample information and electrochemical performances of graphene/Fe<sub>2</sub>O<sub>3</sub> as anodes for Lithium-ion batteries.

| Sample (wt. %)                                                  | Pristine Particle Size | Lithiated Particle Size | Recipe for electrode          | Thickness | Performance                                             |
|-----------------------------------------------------------------|------------------------|-------------------------|-------------------------------|-----------|---------------------------------------------------------|
| $\alpha+\gamma$ -Fe <sub>2</sub> O <sub>3</sub> /graphene (56%) | ~15 nm                 | 48.9 ± 14.6 nm          | No carbon additive, no binder | 250 μm    | 853 mAh/g @ 100 mA/g after 30 cycles (based on hybrid)  |
| $\alpha+\gamma$ -Fe <sub>2</sub> O <sub>3</sub> /graphene (40%) | 12.5 ± 5.5 nm          | --                      | No carbon additive, no binder | 250 μm    | 1166 mAh/g @ 100 mA/g after 30 cycles (based on hybrid) |
| $\gamma$ -Fe <sub>2</sub> O <sub>3</sub> /graphene (56%)        | 8.1 ± 1.2 nm           | 20.6 ± 7.5 nm           | No carbon additive, no binder | 250 μm    | 880 mAh/g @ 100 mA/g (based on hybrid)                  |

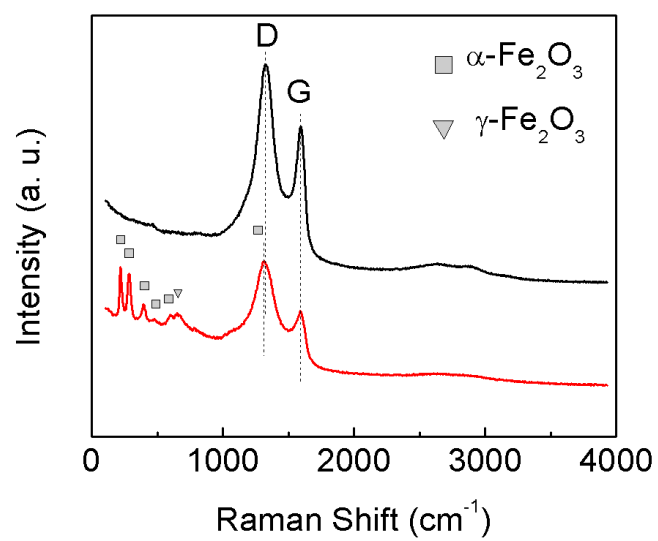

**Fig. S1.** Raman spectra of the 3D graphene and a Fe<sub>2</sub>O<sub>3</sub>/graphene hybrid sample (containing both  $\alpha$ - and  $\gamma$ -Fe<sub>2</sub>O<sub>3</sub>).

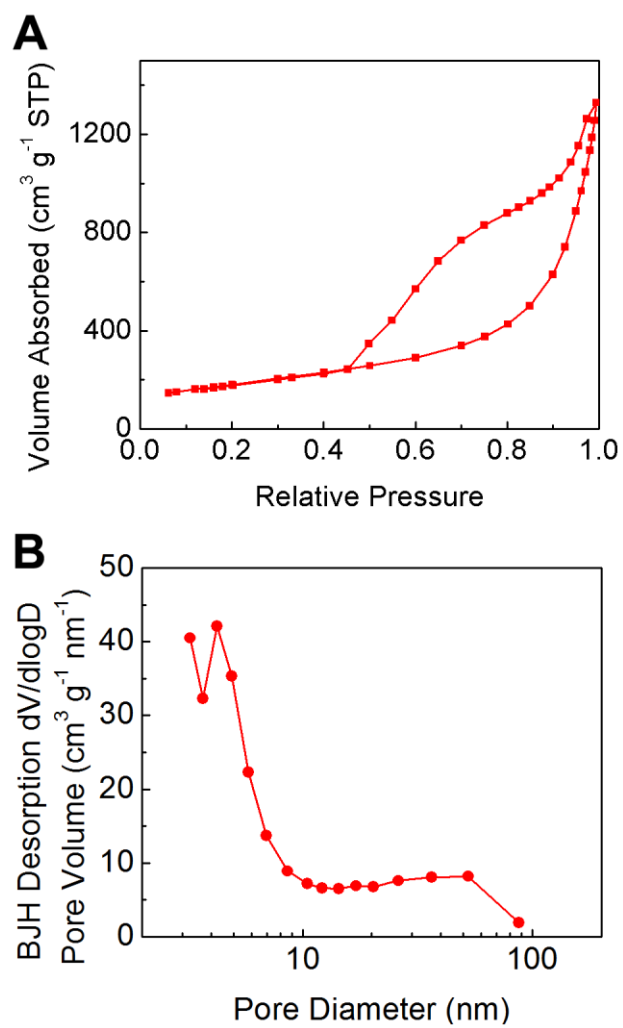

**Fig. S2.** (A) Nitrogen adsorption/desorption isotherms and (B) pore size distribution for Fe<sub>2</sub>O<sub>3</sub>/graphene nanocomposites.

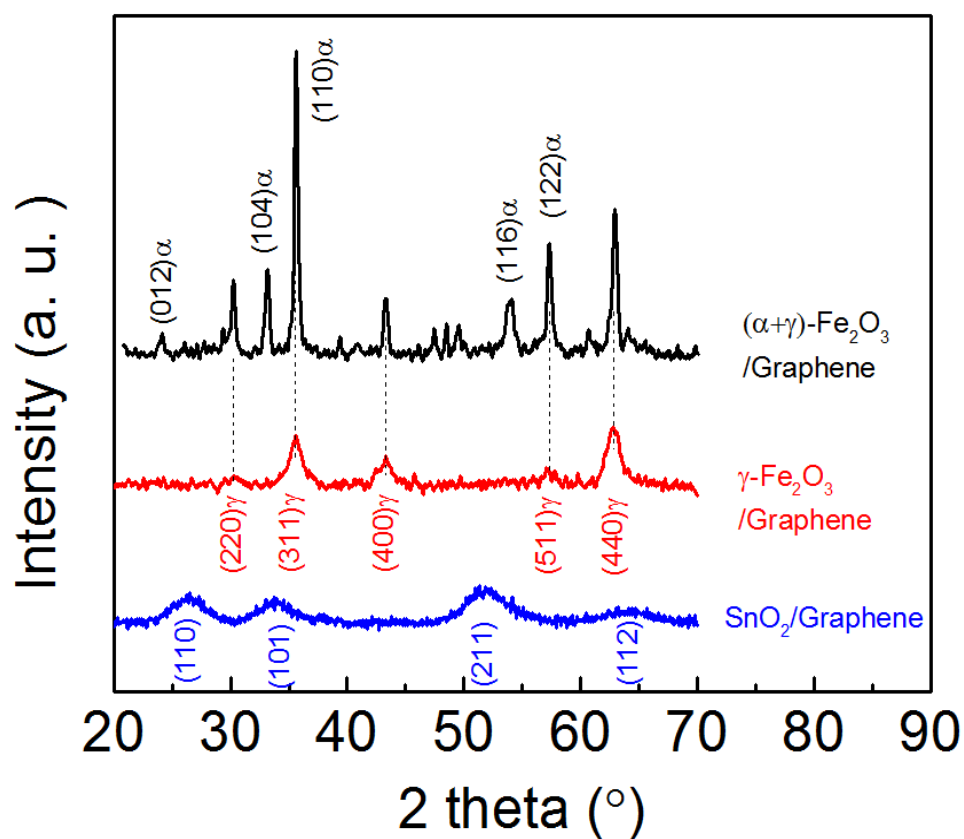

**Fig. S3.** XRD patterns of two representative Fe<sub>2</sub>O<sub>3</sub>/graphene and one SnO<sub>2</sub>/graphene samples. One contains α- and γ-Fe<sub>2</sub>O<sub>3</sub> phases, and the other has 100% γ-Fe<sub>2</sub>O<sub>3</sub>. The peaks are indexed according to JCPDS cards: PDF#00-033-0664 and PDF#00-039-1346.

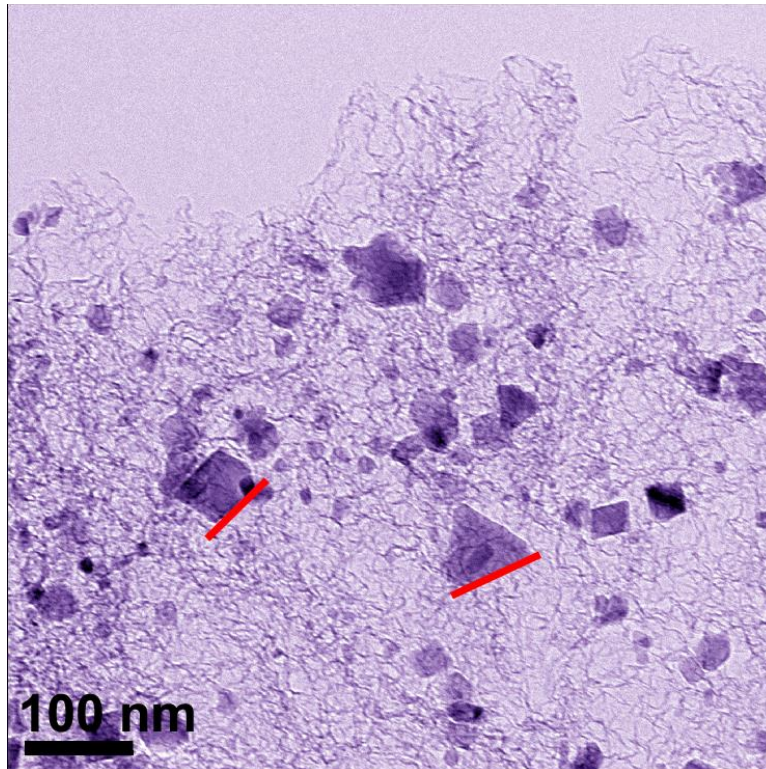

**Fig. S4.** An additional TEM image of  $(\alpha+\gamma)\text{-Fe}_2\text{O}_3/\text{graphene}$  (40 wt.%), indicating the faceted nature of as-grown particles as manifested by the rather straight edges in 2D projection.



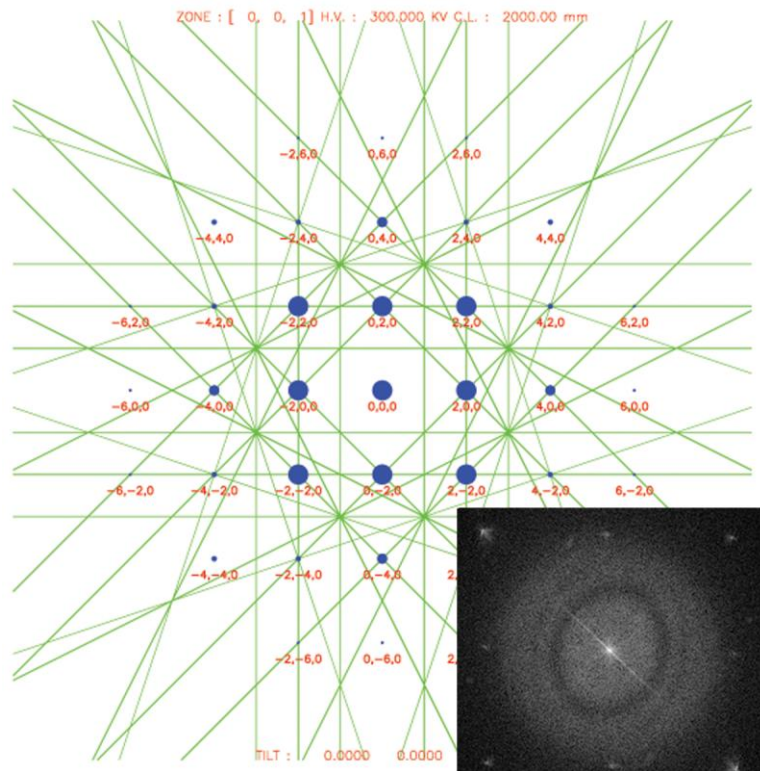

**Fig. S5.** A comparison of simulated  $\text{Li}_2\text{O}$  (cubic) diffraction patterns along  $\langle 100 \rangle$  zone axis with the FFT pattern (inset) from our experiments. A good match is found. The simulation was performed using the online version of WebEMAPS software.<sup>2</sup>

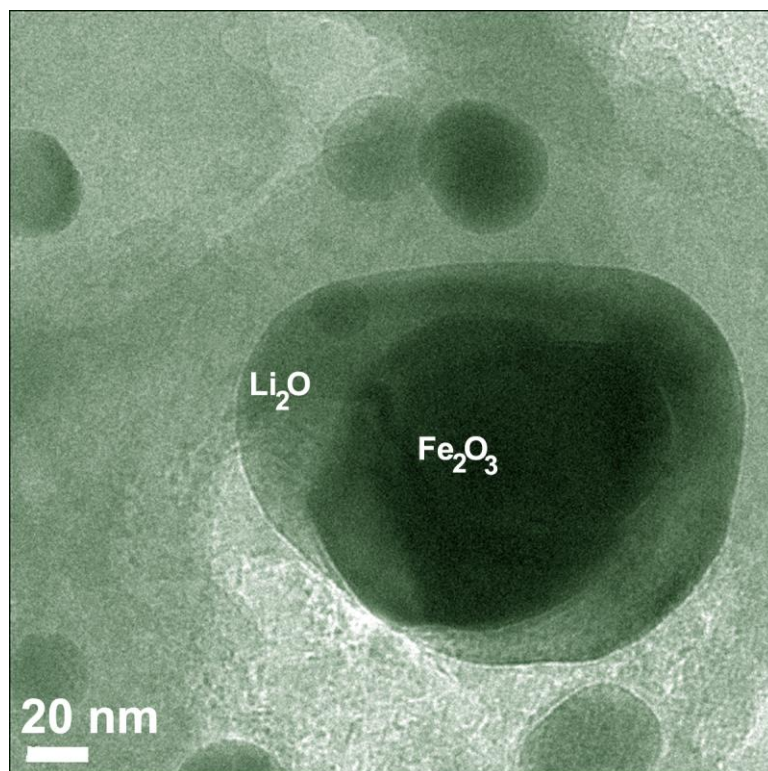

**Fig. S6.** A bright-field TEM image of the lithiated ( $\alpha+\gamma$ )- $\text{Fe}_2\text{O}_3$ /graphene (40 wt.%) after 30 cycles, showing a partially lithiated particle.

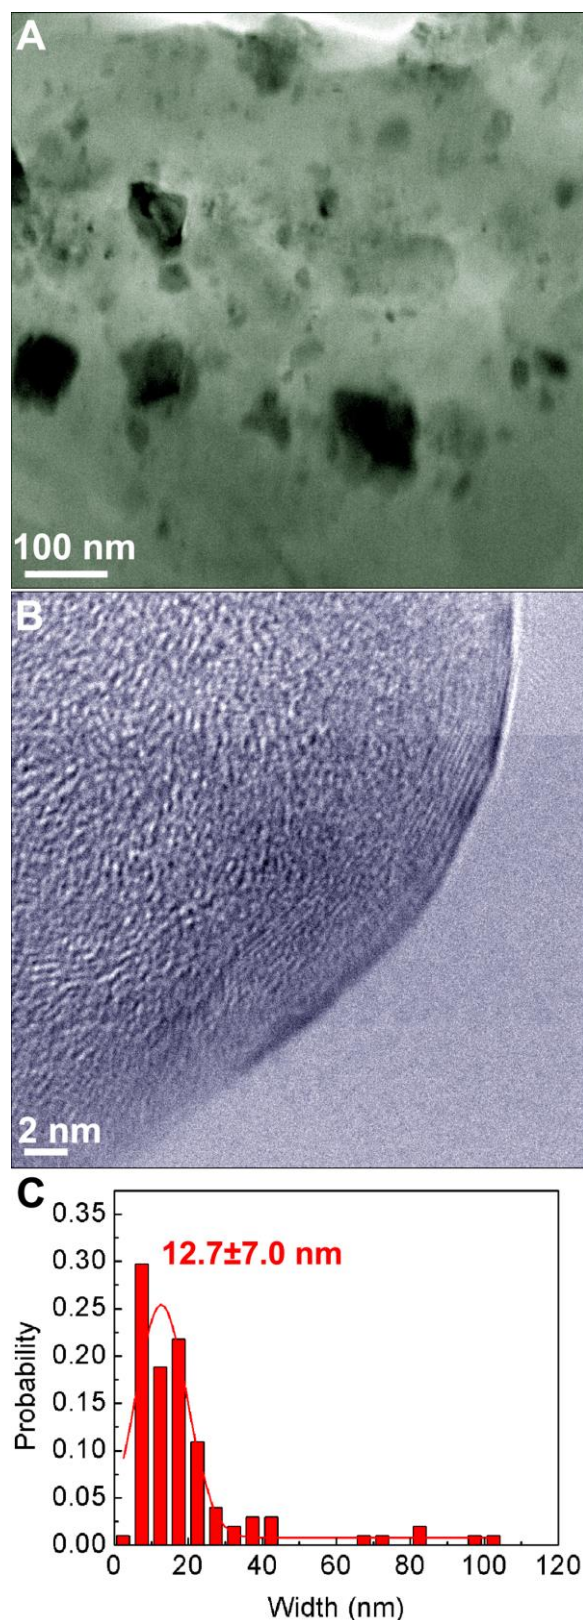

**Fig. S7.** Microstructure of  $(\alpha+\gamma)\text{-Fe}_2\text{O}_3/\text{graphene}$  (40 wt.%) after 30 cycles. The final state of the sample is charged to 3V (i.e., delithiated). (A) A TEM image of  $\text{Fe}_2\text{O}_3/\text{graphene}$ , showing the faceted characteristics of particles. (B) A high-resolution TEM of a selected particle. (C) The particle size distribution from the count of 101 particles. The fitting by log-normal distribution yields an average particle size of  $12.7 \pm 7.0$  nm.

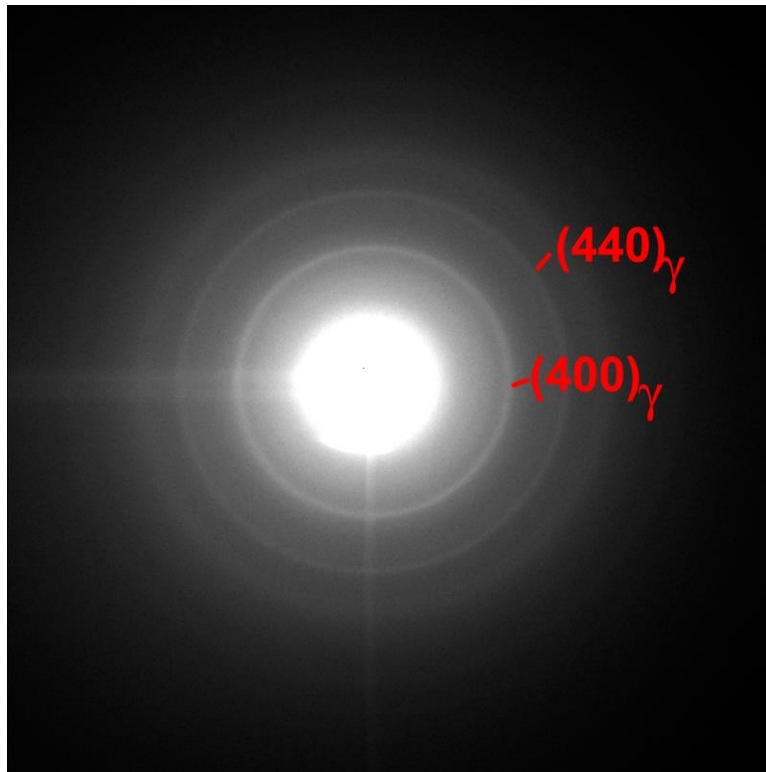

**Fig. S8.** Selected area diffraction (SAD) pattern taken from a  $(\alpha+\gamma)$ - $\text{Fe}_2\text{O}_3$ /graphene (40 wt.%) sample after 30 cycles and charged to the delithiated state (3.0V). The as-synthesized sample contains both  $\alpha$ - and  $\gamma$ - $\text{Fe}_2\text{O}_3$ .

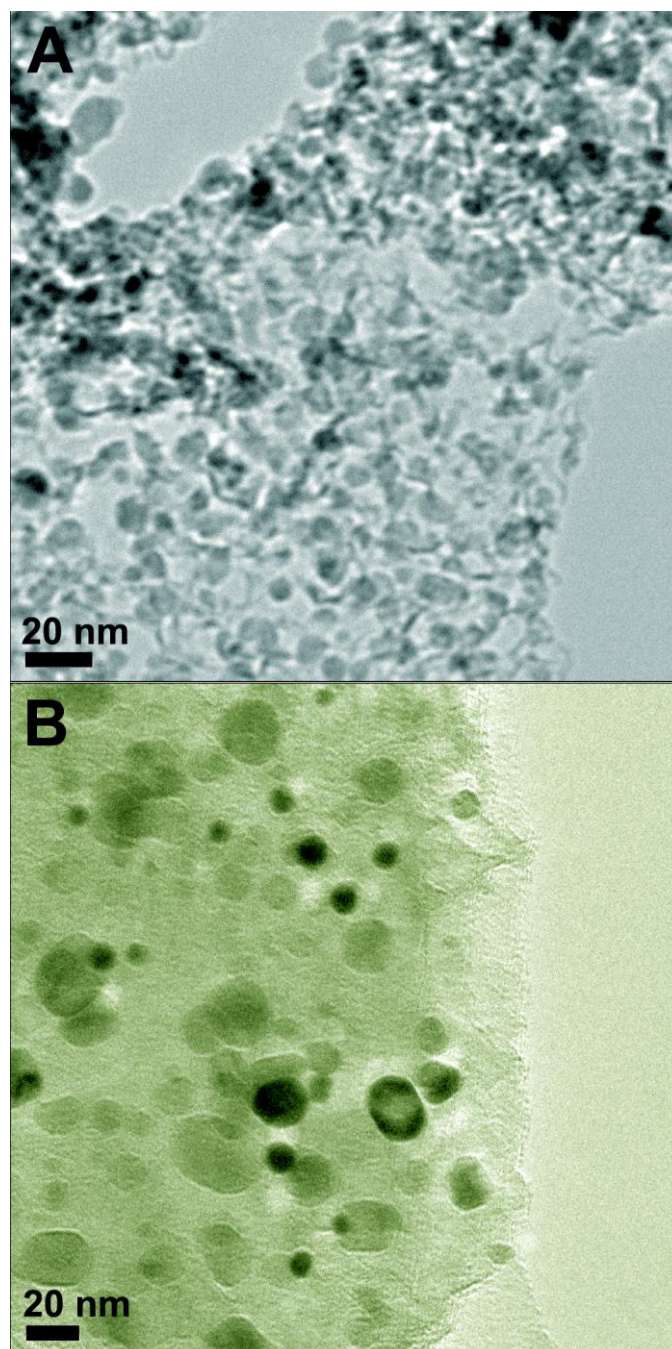

**Fig. S9.** Bright-field TEM images of  $\gamma\text{-Fe}_2\text{O}_3/\text{graphene}$  (56 wt.%) in (A) the as-synthesized state, and (B) the lithiated state after 5 cycles. The particle sizes reported in Table 2 are measured from a series of TEM images similar to the ones shown above. The average particle sizes for the as-synthesized  $\gamma\text{-Fe}_2\text{O}_3$  and the lithiated state are  $8.1 \pm 1.2$  nm (from 100 counts) and  $20.6 \pm 7.5$  nm (from 134 counts), respectively.

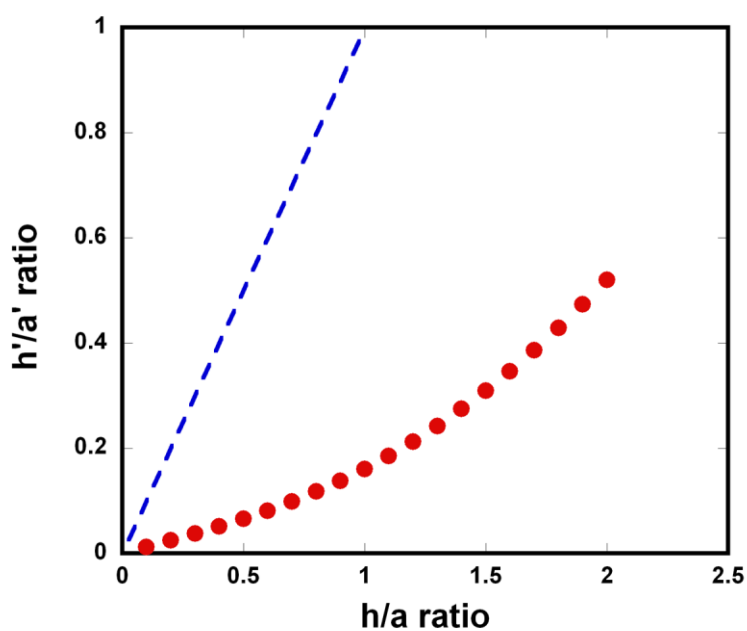

**Fig. S10.** The calculated ratio change ( $h'/a'$ ) after the lithiation, as a function of the initial particle shape defined by  $h/a$  (see Spherical-cap model section for the details). The blue dashed line denotes  $\frac{h'/a'}{h/a} = 1$  (i.e., uniform expansion line). Note the substantial reduction of  $h'/a'$  after the lithiation, suggestive of “pancake” shape-change behavior. The calculation parameters are  $2a=8.1$  nm, and  $2a'=20.6$  nm, both of which are measured by TEM (see Table 2,  $\gamma$ - $\text{Fe}_2\text{O}_3$  and Fig. S10). The volume expansion is assumed as  $\sim 96\%$ .<sup>1</sup>

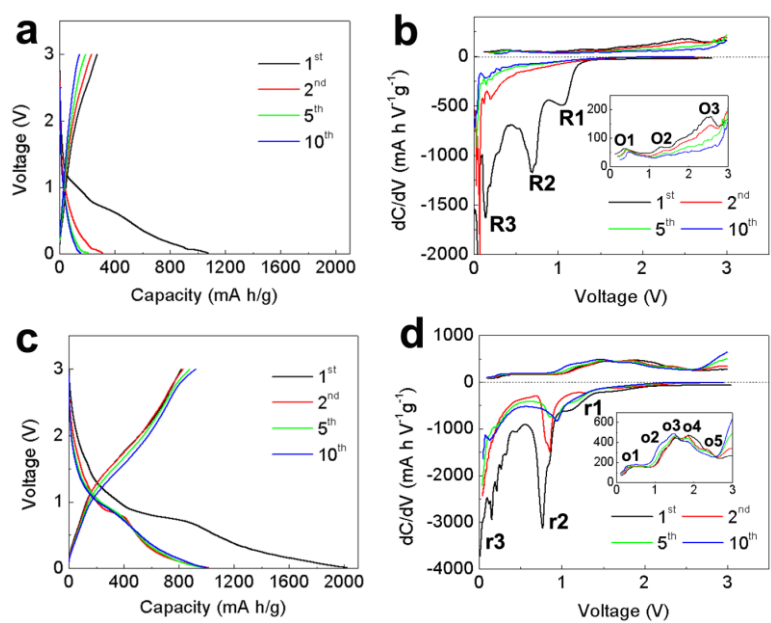

**Fig. S11.** (a)-(d) Selected charge/discharge cycles for (a) pure 3D graphene and (c) Fe<sub>2</sub>O<sub>3</sub>/graphene (40 wt.%), and their corresponding differential capacity curves, (b) and (d), respectively. Note the maintenance of multiple oxidation peaks in the nanocomposite after multiple cycles.

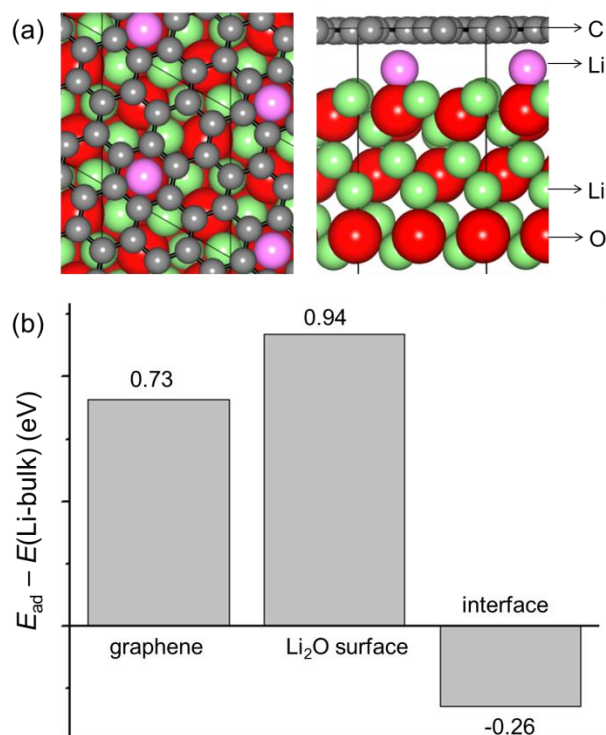

**Fig. S12** (a) Structure of Li storage at the graphene-Li<sub>2</sub>O interface. Left: top view; Right: side view. The interface Li are shown in a different color from those in Li<sub>2</sub>O. The black lines indicate the boundary of the supercell used for calculations. (b) The adsorption energy (see Eq. 1 in the main text) with respect to the energy of bulk Li, for Li adsorbed on graphene, on Li<sub>2</sub>O surface, and at the graphene-Li<sub>2</sub>O interface. All three cases have the concentration of adsorbed Li.



## References

1. Lin, Y. M.; Abel, P. R.; Heller, A.; Mullins, C. B., alpha-Fe<sub>2</sub>O<sub>3</sub> Nanorods as Anode Material for Lithium Ion Batteries. *J. Phys. Chem. Lett.* **2011**, 2 (22), 2885-2891.
2. J.M. Zuo and J.C. Mabon, Web-based Electron Microscopy Application Software: Web-EMAPS, *Microsc Microanal* 10 (Suppl 2), 2004; URL: <http://emaps.mrl.uiuc.edu/>.
